# Supplementary material for: Identification of potential biomarkers related to glioma survival by gene expression profile analysis
Source: PubMed Central journal article supplement (PMC7402580; doi:10.1186/s12920-019-0479-6), 2019-03-20
Supplement: 12920_2019_479_MOESM1_ESM.pdf [file 12920_2019_479_MOESM1_ESM.pdf]

**Table S1. 104 common survival-related genes were identified from patients with GBM and those with LGG.**

| Gene symbol     | LGG                      |                       |                                                    | GBM                      |                       |                                                    |
|-----------------|--------------------------|-----------------------|----------------------------------------------------|--------------------------|-----------------------|----------------------------------------------------|
|                 | HR<br>(95% CI<br>for HR) | Wald test,<br>p value | Before and after<br>median OS<br>(t test, p value) | HR<br>(95% CI<br>for HR) | Wald test,<br>p value | Before and after<br>median OS<br>(t test, p value) |
| <b>ACADS</b>    | 1.4 (1.2-1.6)            | 4.50E-06              | 2.49E-04                                           | 1.3 (1.1-1.6)            | 1.50E-03              | 4.77E-02                                           |
| <b>ACAP1</b>    | 1.6 (1.4-1.8)            | 2.50E-14              | 5.20E-05                                           | 1.3 (1.1-1.5)            | 1.20E-03              | 1.68E-02                                           |
| <b>ADAMTS14</b> | 1.2 (1.1-1.3)            | 7.50E-04              | 4.32E-03                                           | 1.2 (1.1-1.4)            | 6.00E-03              | 9.87E-04                                           |
| <b>B3GNT9</b>   | 1.5 (1.2-1.7)            | 1.20E-05              | 2.20E-02                                           | 1.3 (1.1-1.5)            | 4.40E-03              | 3.10E-02                                           |
| <b>BACE2</b>    | 1.5 (1.3-1.6)            | 3.30E-14              | 6.96E-04                                           | 1.4 (1.1-1.6)            | 6.80E-04              | 2.40E-03                                           |
| <b>BCL3</b>     | 1.4 (1.3-1.6)            | 2.80E-10              | 7.91E-03                                           | 1.2 (1.1-1.4)            | 7.20E-03              | 2.86E-02                                           |
| <b>BMP1</b>     | 1.6 (1.4-1.9)            | 4.00E-13              | 3.71E-02                                           | 1.3 (1.1-1.5)            | 3.10E-03              | 8.48E-03                                           |
| <b>C8orf4</b>   | 1.2 (1.1-1.4)            | 1.30E-03              | 1.52E-03                                           | 1.3 (1.1-1.6)            | 9.80E-03              | 1.92E-02                                           |
| <b>C9orf89</b>  | 1.5 (1.3-1.7)            | 4.50E-07              | 1.98E-02                                           | 1.3 (1.1-1.5)            | 7.10E-03              | 4.67E-02                                           |
| <b>CAV1</b>     | 1.2 (1.1-1.4)            | 7.50E-03              | 8.64E-03                                           | 1.3 (1.1-1.5)            | 4.20E-03              | 1.31E-03                                           |
| <b>CCL5</b>     | 1.4 (1.3-1.6)            | 5.00E-09              | 5.00E-06                                           | 1.2 (1.1-1.5)            | 8.30E-03              | 3.86E-02                                           |
| <b>CD247</b>    | 1.5 (1.3-1.7)            | 3.10E-09              | 9.30E-05                                           | 1.2 (1.1-1.5)            | 8.40E-03              | 2.69E-02                                           |
| <b>CD276</b>    | 1.6 (1.4-1.8)            | 1.10E-13              | 1.03E-03                                           | 1.3 (1.1-1.5)            | 2.00E-03              | 1.17E-04                                           |
| <b>CD6</b>      | 1.4 (1.2-1.6)            | 1.80E-06              | 7.65E-03                                           | 1.3 (1.1-1.5)            | 6.80E-03              | 4.21E-02                                           |
| <b>CD7</b>      | 1.2 (1.1-1.3)            | 3.30E-03              | 1.74E-03                                           | 1.3 (1.1-1.5)            | 4.80E-03              | 4.53E-02                                           |
| <b>CD79B</b>    | 1.7 (1.4-2.1)            | 5.80E-07              | 1.90E-03                                           | 1.2 (1.1-1.4)            | 4.90E-03              | 3.39E-02                                           |
| <b>CLCF1</b>    | 1.3 (1.2-1.4)            | 8.40E-09              | 6.58E-04                                           | 1.3 (1.1-1.6)            | 1.40E-03              | 2.23E-02                                           |
| <b>CLCNKA</b>   | 1.2 (1.1-1.3)            | 3.90E-06              | 7.31E-04                                           | 1.2 (1.1-1.5)            | 6.70E-03              | 4.60E-02                                           |
| <b>CLDN7</b>    | 1.3 (1.1-1.5)            | 1.40E-04              | 2.51E-02                                           | 1.4 (1.1-1.7)            | 4.90E-03              | 7.93E-03                                           |
| <b>CLEC18A</b>  | 1.5 (1.3-1.6)            | 1.10E-13              | 0.00E+00                                           | 1.3 (1.1-1.6)            | 3.50E-03              | 3.25E-02                                           |
| <b>CLEC4C</b>   | 1.2 (1.1-1.4)            | 6.90E-04              | 2.62E-03                                           | 1.3 (1.1-1.6)            | 9.20E-04              | 4.58E-03                                           |
| <b>CLPTM1L</b>  | 1.3 (1.1-1.5)            | 3.20E-04              | 6.35E-04                                           | 1.3 (1.1-1.5)            | 4.90E-04              | 8.36E-03                                           |
| <b>CNPY4</b>    | 1.8 (1.5-2.1)            | 5.30E-15              | 4.41E-03                                           | 1.4 (1.2-1.6)            | 9.10E-05              | 4.32E-02                                           |
| <b>COL12A1</b>  | 1.4 (1.3-1.6)            | 3.30E-11              | 3.43E-02                                           | 1.4 (1.1-1.8)            | 2.50E-03              | 3.61E-02                                           |
| <b>COL22A1</b>  | 1.4 (1.3-1.6)            | 1.10E-09              | 3.87E-04                                           | 1.4 (1.2-1.7)            | 3.70E-05              | 4.17E-03                                           |
| <b>COL8A1</b>   | 1.3 (1.2-1.4)            | 5.00E-15              | 2.10E-04                                           | 1.3 (1.1-1.5)            | 6.40E-03              | 2.56E-02                                           |
| <b>CPQ</b>      | 2.1 (1.8-2.5)            | 0.00E+00              | 3.00E-06                                           | 1.4 (1.1-1.7)            | 5.40E-04              | 4.71E-02                                           |
| <b>CTSB</b>     | 1.6 (1.4-1.8)            | 2.10E-10              | 2.04E-02                                           | 1.4 (1.1-1.6)            | 9.60E-04              | 4.24E-03                                           |

|                |               |          |          |               |          |          |
|----------------|---------------|----------|----------|---------------|----------|----------|
| <b>CTSZ</b>    | 1.5 (1.3-1.7) | 1.70E-08 | 5.63E-03 | 1.3 (1.1-1.6) | 6.10E-03 | 4.36E-02 |
| <b>CXCR6</b>   | 1.5 (1.3-1.8) | 1.30E-07 | 2.00E-06 | 1.3 (1.1-1.6) | 3.30E-03 | 3.98E-02 |
| <b>DCBLD2</b>  | 1.3 (1.2-1.4) | 4.80E-09 | 2.15E-04 | 1.2 (1.1-1.5) | 5.00E-03 | 1.13E-02 |
| <b>EFEMP2</b>  | 2 (1.8-2.3)   | 0.00E+00 | 0.00E+00 | 1.5 (1.2-1.8) | 9.30E-05 | 1.15E-02 |
| <b>ETNK2</b>   | 1.2 (1.1-1.3) | 3.00E-05 | 2.79E-02 | 1.2 (1.1-1.5) | 9.90E-03 | 3.34E-02 |
| <b>FABP5</b>   | 1.5 (1.3-1.6) | 0.00E+00 | 1.00E-06 | 1.3 (1.1-1.6) | 6.90E-03 | 2.99E-02 |
| <b>FAM115C</b> | 1.3 (1.2-1.5) | 3.90E-06 | 1.86E-03 | 1.3 (1.1-1.6) | 1.50E-03 | 1.37E-02 |
| <b>FAM20C</b>  | 1.4 (1.3-1.5) | 1.30E-10 | 2.26E-03 | 1.4 (1.2-1.6) | 3.50E-04 | 3.13E-03 |
| <b>FBLIM1</b>  | 1.2 (1.1-1.4) | 3.90E-04 | 2.22E-03 | 1.2 (1.1-1.5) | 8.40E-03 | 6.72E-03 |
| <b>FCRL5</b>   | 1.6 (1.3-2)   | 9.70E-05 | 4.90E-02 | 1.4 (1.2-1.7) | 9.50E-05 | 6.51E-03 |
| <b>FER1L4</b>  | 1.2 (1.1-1.3) | 8.70E-05 | 2.98E-02 | 1.3 (1.1-1.6) | 1.60E-03 | 2.69E-02 |
| <b>FES</b>     | 1.5 (1.3-1.8) | 6.00E-10 | 1.12E-03 | 1.3 (1.1-1.6) | 1.90E-03 | 3.33E-02 |
| <b>FOSL1</b>   | 1.2 (1.1-1.3) | 8.00E-04 | 6.01E-03 | 1.4 (1.2-1.6) | 1.80E-04 | 2.79E-02 |
| <b>GRN</b>     | 1.5 (1.3-1.7) | 7.60E-08 | 5.68E-04 | 1.3 (1.1-1.5) | 9.70E-03 | 2.35E-02 |
| <b>HOXD10</b>  | 1.3 (1.2-1.5) | 6.80E-11 | 2.10E-05 | 1.3 (1.1-1.5) | 5.90E-03 | 5.97E-03 |
| <b>HOXD11</b>  | 1.4 (1.3-1.5) | 1.90E-12 | 3.10E-05 | 1.3 (1.1-1.6) | 4.80E-03 | 4.00E-02 |
| <b>HSPA7</b>   | 1.2 (1.1-1.3) | 6.90E-06 | 4.24E-04 | 1.3 (1.1-1.5) | 4.50E-03 | 4.57E-02 |
| <b>HSPB1</b>   | 1.6 (1.4-1.8) | 1.60E-14 | 0.00E+00 | 1.3 (1.1-1.6) | 1.70E-03 | 1.76E-02 |
| <b>IL1R2</b>   | 1.2 (1.1-1.3) | 8.70E-04 | 2.46E-02 | 1.3 (1.1-1.6) | 5.00E-03 | 1.11E-02 |
| <b>IL2RB</b>   | 1.3 (1.1-1.5) | 6.80E-04 | 6.20E-05 | 1.3 (1.1-1.5) | 5.20E-03 | 2.29E-02 |
| <b>ITGA3</b>   | 1.4 (1.3-1.6) | 3.40E-14 | 5.95E-04 | 1.3 (1.1-1.5) | 1.90E-03 | 2.48E-02 |
| <b>ITGA5</b>   | 1.2 (1.1-1.3) | 4.40E-05 | 2.13E-04 | 1.3 (1.1-1.6) | 5.10E-04 | 1.58E-03 |
| <b>ITGB7</b>   | 1.2 (1.1-1.3) | 1.20E-04 | 3.11E-04 | 1.3 (1.1-1.5) | 1.20E-03 | 3.88E-02 |
| <b>ITGBL1</b>  | 1.2 (1.1-1.3) | 1.50E-03 | 1.11E-02 | 1.3 (1.1-1.5) | 4.10E-03 | 4.24E-02 |
| <b>KCNN4</b>   | 1.4 (1.2-1.6) | 4.40E-07 | 2.20E-05 | 1.3 (1.1-1.5) | 2.50E-03 | 1.03E-02 |
| <b>KDELR2</b>  | 1.4 (1.3-1.6) | 2.20E-12 | 5.03E-03 | 1.3 (1.1-1.5) | 3.10E-03 | 4.12E-02 |
| <b>KLF10</b>   | 1.4 (1.2-1.6) | 1.10E-08 | 2.73E-04 | 1.3 (1.1-1.6) | 2.90E-03 | 6.52E-03 |
| <b>LIF</b>     | 1.2 (1.1-1.4) | 1.10E-05 | 1.54E-02 | 1.3 (1.1-1.6) | 2.20E-03 | 2.15E-02 |
| <b>LILRB3</b>  | 1.5 (1.3-1.8) | 1.30E-10 | 1.60E-05 | 1.3 (1.1-1.6) | 3.60E-04 | 1.27E-03 |
| <b>LITAF</b>   | 1.5 (1.3-1.7) | 1.20E-07 | 3.34E-02 | 1.3 (1.1-1.6) | 1.70E-03 | 9.96E-03 |
| <b>LRRC15</b>  | 1.2 (1.1-1.4) | 2.30E-03 | 7.35E-03 | 1.2 (1.1-1.5) | 8.90E-03 | 2.17E-02 |
| <b>LSP1</b>    | 1.7 (1.5-1.9) | 0.00E+00 | 3.07E-03 | 1.3 (1.1-1.5) | 5.80E-04 | 9.94E-03 |
| <b>LZTS1</b>   | 1.4 (1.2-1.6) | 9.60E-07 | 3.85E-02 | 1.2 (1.1-1.4) | 9.40E-03 | 3.59E-03 |

|                  |               |          |          |               |          |          |
|------------------|---------------|----------|----------|---------------|----------|----------|
| <b>MAP2K3</b>    | 1.6 (1.4-1.8) | 1.30E-15 | 1.11E-02 | 1.3 (1.1-1.6) | 1.90E-03 | 1.25E-02 |
| <b>MDK</b>       | 1.3 (1.2-1.5) | 4.00E-07 | 2.78E-02 | 1.3 (1.1-1.5) | 5.10E-03 | 4.15E-03 |
| <b>MICALL2</b>   | 1.5 (1.3-1.6) | 1.80E-11 | 1.08E-04 | 1.3 (1.1-1.5) | 3.60E-03 | 1.01E-02 |
| <b>MMP2</b>      | 1.2 (1.1-1.3) | 3.60E-04 | 3.09E-03 | 1.4 (1.2-1.8) | 4.40E-04 | 2.19E-02 |
| <b>MXRA8</b>     | 1.5 (1.3-1.7) | 1.60E-09 | 2.31E-03 | 1.4 (1.2-1.7) | 3.00E-05 | 9.88E-03 |
| <b>MYO1C</b>     | 1.3 (1.1-1.4) | 1.60E-05 | 5.55E-03 | 1.3 (1.1-1.5) | 6.40E-03 | 1.14E-02 |
| <b>MYO1G</b>     | 1.3 (1.1-1.4) | 3.90E-05 | 1.58E-02 | 1.3 (1.1-1.6) | 3.10E-03 | 2.54E-02 |
| <b>NFE2</b>      | 1.4 (1.2-1.6) | 4.50E-07 | 2.38E-02 | 1.3 (1.1-1.6) | 2.80E-03 | 6.67E-03 |
| <b>NRP1</b>      | 1.4 (1.2-1.6) | 3.60E-06 | 4.83E-02 | 1.3 (1.1-1.6) | 3.40E-03 | 9.27E-04 |
| <b>NSUN5</b>     | 1.3 (1.1-1.5) | 2.10E-03 | 1.70E-02 | 1.4 (1.2-1.7) | 3.10E-05 | 5.46E-03 |
| <b>OSMR</b>      | 1.5 (1.4-1.7) | 0.00E+00 | 9.00E-05 | 1.4 (1.2-1.7) | 4.50E-04 | 1.64E-02 |
| <b>P4HA2</b>     | 1.3 (1.2-1.5) | 8.70E-06 | 1.22E-03 | 1.3 (1.1-1.5) | 8.30E-04 | 2.13E-03 |
| <b>PARVA</b>     | 1.2 (1.1-1.4) | 8.30E-03 | 1.41E-02 | 1.4 (1.1-1.6) | 1.50E-03 | 2.10E-02 |
| <b>PDIA4</b>     | 1.7 (1.5-2)   | 0.00E+00 | 1.98E-02 | 1.3 (1.1-1.5) | 4.40E-04 | 4.72E-03 |
| <b>PDZK1</b>     | 1.4 (1.2-1.5) | 6.40E-07 | 2.21E-03 | 1.3 (1.1-1.6) | 5.70E-04 | 2.99E-02 |
| <b>PLAUR</b>     | 1.3 (1.2-1.4) | 2.90E-11 | 9.55E-03 | 1.4 (1.2-1.6) | 1.10E-04 | 5.59E-04 |
| <b>PLOD3</b>     | 1.7 (1.5-1.9) | 6.70E-16 | 2.67E-04 | 1.2 (1.1-1.4) | 6.10E-03 | 2.29E-02 |
| <b>PLSCR3</b>    | 1.4 (1.2-1.6) | 2.00E-05 | 6.20E-03 | 1.3 (1.1-1.6) | 5.30E-03 | 7.11E-03 |
| <b>POM121L8P</b> | 1.3 (1.2-1.5) | 1.30E-05 | 3.10E-03 | 1.4 (1.1-1.6) | 4.20E-04 | 1.74E-02 |
| <b>POM121L9P</b> | 1.4 (1.2-1.5) | 3.80E-06 | 4.10E-05 | 1.3 (1.1-1.5) | 3.80E-04 | 7.64E-03 |
| <b>PTRF</b>      | 1.5 (1.4-1.7) | 1.10E-14 | 1.69E-02 | 1.3 (1.1-1.5) | 6.50E-04 | 3.48E-02 |
| <b>RAB27A</b>    | 1.6 (1.4-1.8) | 6.90E-14 | 2.32E-04 | 1.3 (1.1-1.5) | 5.20E-03 | 1.71E-02 |
| <b>SCO1</b>      | 1.5 (1.2-1.8) | 9.50E-06 | 7.16E-04 | 1.4 (1.1-1.7) | 1.40E-03 | 1.04E-02 |
| <b>SERPINE1</b>  | 1.3 (1.2-1.5) | 6.90E-08 | 1.76E-03 | 1.2 (1-1.4)   | 9.60E-03 | 4.26E-02 |
| <b>SH3D21</b>    | 1.2 (1.1-1.4) | 2.60E-03 | 2.81E-02 | 1.4 (1.2-1.7) | 8.70E-04 | 7.87E-03 |
| <b>SLC16A3</b>   | 1.4 (1.2-1.5) | 2.70E-08 | 4.85E-02 | 1.4 (1.1-1.7) | 8.80E-04 | 9.17E-04 |
| <b>SLC20A1</b>   | 1.3 (1.2-1.4) | 1.20E-09 | 1.65E-02 | 1.3 (1.1-1.6) | 1.10E-03 | 8.83E-03 |
| <b>SLC43A3</b>   | 1.3 (1.2-1.4) | 6.30E-07 | 1.00E-06 | 1.3 (1.1-1.6) | 2.00E-03 | 2.26E-02 |
| <b>SLC5A3</b>    | 1.2 (1-1.3)   | 7.00E-03 | 7.84E-03 | 1.3 (1.1-1.5) | 4.30E-03 | 4.59E-02 |
| <b>SMAGP</b>     | 1.8 (1.5-2)   | 0.00E+00 | 1.25E-03 | 1.3 (1.1-1.6) | 2.40E-03 | 1.05E-02 |
| <b>SOAT2</b>     | 1.4 (1.2-1.7) | 3.10E-05 | 7.92E-03 | 1.3 (1.2-1.6) | 1.40E-04 | 3.62E-03 |
| <b>SOCS3</b>     | 1.4 (1.2-1.5) | 3.60E-09 | 1.04E-02 | 1.4 (1.1-1.6) | 4.90E-04 | 1.56E-02 |
| <b>TBC1D10C</b>  | 1.5 (1.3-1.8) | 2.00E-09 | 1.30E-05 | 1.3 (1.1-1.5) | 3.90E-03 | 4.20E-03 |

|                |               |          |          |               |          |          |
|----------------|---------------|----------|----------|---------------|----------|----------|
| <b>TIMP1</b>   | 1.5 (1.4-1.6) | 0.00E+00 | 7.87E-04 | 1.4 (1.2-1.7) | 4.70E-05 | 1.06E-02 |
| <b>TMEM2</b>   | 1.5 (1.3-1.7) | 2.40E-13 | 6.64E-03 | 1.3 (1.1-1.5) | 9.00E-03 | 7.73E-03 |
| <b>TMPRSS3</b> | 1.2 (1.1-1.4) | 2.20E-06 | 1.69E-03 | 1.2 (1.1-1.5) | 6.30E-03 | 1.55E-02 |
| <b>TNFSF14</b> | 1.2 (1.1-1.3) | 1.90E-08 | 1.53E-03 | 1.3 (1.1-1.5) | 3.70E-03 | 3.32E-02 |
| <b>TRAM2</b>   | 1.1 (1.1-1.2) | 1.10E-04 | 6.56E-03 | 1.3 (1.1-1.5) | 8.10E-03 | 2.10E-02 |
| <b>TREML2</b>  | 1.2 (1.1-1.4) | 9.00E-04 | 6.61E-04 | 1.3 (1.1-1.5) | 6.80E-03 | 4.38E-02 |
| <b>TSHZ2</b>   | 1.4 (1.2-1.7) | 1.80E-06 | 4.40E-03 | 1.4 (1.1-1.8) | 2.70E-03 | 8.83E-04 |
| <b>TUBA1C</b>  | 1.7 (1.5-1.9) | 0.00E+00 | 0.00E+00 | 1.4 (1.1-1.7) | 2.80E-03 | 4.46E-02 |
| <b>VDR</b>     | 1.5 (1.4-1.7) | 4.40E-16 | 8.64E-04 | 1.2 (1.1-1.4) | 3.80E-03 | 3.18E-02 |
| <b>VNN3</b>    | 1.2 (1.1-1.4) | 2.80E-04 | 9.13E-03 | 1.2 (1.1-1.4) | 7.20E-03 | 5.91E-03 |

CI: confidence interval.

Before and after median OS: comparing gene expression level of patients who were dead before the median OS to ones who were dead after the median OS.

Median OS: GBM is approximately at 450 days (~15 months); LGG is approximately at 2700 days (~90 months).
